# Supplementary material for: Effect of Biochar and Compost Addition on Mitigating Salinity Stress and Improving Fruit Quality of Tomato
Source: MDPI journal article supplement (doi:10.3390/agronomy13092197), 2023-08-22
Supplement: s1 [file s1]

Archive with 1 entries (1 files):
- agronomy-2558075-supplementary-FC done.pdf
