# Supplementary material for: Effect of Biochar and Compost Addition on Mitigating Salinity Stress and Improving Fruit Quality of Tomato
Source: MDPI journal article supplement (doi:10.3390/agronomy13092197), 2023-08-22
Supplement: s1 [file s1 › agronomy-2558075-supplementary-FC done.pdf]

## SUPPLEMENTARY MATERIAL

# Effect of Biochar and Compost Addition on Mitigating Salinity Stress and Improving Fruit Quality of Tomato

Muhammad Mughees Ud Din <sup>1</sup>, Muhammad Imran Khan <sup>1,2,\*</sup>, Muhammad Azam <sup>3</sup>, Muhammad Hayder Ali <sup>1</sup>, Rashad Qadri <sup>3</sup>, Muhammad Naveed <sup>1</sup> and Abdul Nasir <sup>4</sup>

<sup>1</sup> Institute of Soil and Environmental Sciences, University of Agriculture, Faisalabad 38040, Pakistan; mugheesuddin24@gmail.com (M.M.U.D.); hayderali3033@gmail.com (M.H.A.); mnaveeduaf@googlemail.com (M.N.)

<sup>2</sup> Department of Isotope Biogeochemistry, Helmholtz – Center for Environmental Research – UFZ, 04318 Leipzig, Germany

<sup>3</sup> Institute of Horticultural Sciences, University of Agriculture, Faisalabad 38040, Pakistan; azam32jb@yahoo.com (M.A.); waseemrana\_83pk@yahoo.com (R.Q.)

<sup>4</sup> Department of Forestry and Range Management, University of Agriculture, Faisalabad 38040, Pakistan; abdulnasirmauia@gmail.com

\* Correspondence: khanimran1173@yahoo.com or khanimran@uaf.edu.pk

**Table S1.** Detail of treatments used in this study.

| Treatments | Details                                                  |
|------------|----------------------------------------------------------|
| Control    | Plants grown on non-saline soil                          |
| S          | Plants grown on saline soil                              |
| BC         | Plants grown on non-saline soil with biochar             |
| S + BC     | Plants grown on saline soil with biochar                 |
| C          | Plants grown on non-saline soil with compost             |
| S + C      | Plants grown on saline soil with compost                 |
| BC+C       | Plants grown on non-saline soil with biochar and compost |
| S + BC + C | Plants grown on saline soil with biochar and compost     |

S, Salinity; BC, Biochar; C, Compost.

**Table S2.** Physicochemical properties of soil, biochar, and compost used in this study.

| Properties              | Units                 | Soil                                             | Biochar     | Compost     |
|-------------------------|-----------------------|--------------------------------------------------|-------------|-------------|
| Soil texture            | %                     | Sandy loam<br>(Sand 50, Silt 26.4,<br>Clay 23.6) | -           | -           |
| Saturation percentage   | %                     | 30.0                                             | -           | -           |
| pH                      | -                     | 7.80 ± 0.12                                      | 8.0 ± 0.16  | -           |
| CEC                     | cmol kg <sup>-1</sup> | 14.2 ± 0.37                                      | 49.0 ± 2.36 | -           |
| EC                      | dS m <sup>-1</sup>    | 1.96 ± 0.21                                      | 2.4 ± 0.15  | -           |
| Organic matter          | %                     | 0.21 ± 0.02                                      | -           | -           |
| Soluble Na <sup>+</sup> | me L <sup>-1</sup>    | 17.1 ± 0.67                                      | -           | -           |
| Carbon                  | %                     | -                                                | 46.2 ± 4.1  | 23.5 ± 1.6  |
| Nitrogen                | %                     | 0.09 ± 0.01                                      | 0.12 ± 0.04 | 2.7 ± 0.26  |
| Phosphorous             | %                     | 0.003 ± 0.001                                    | 0.18 ± 0.05 | 0.47 ± 0.08 |
| Potassium               | %                     | 0.017 ± 0.001                                    | 0.73 ± 0.09 | 1.65 ± 0.19 |

CEC, Cation Exchange Capacity; EC, Electrical conductivity; Na<sup>+</sup>, Sodium.

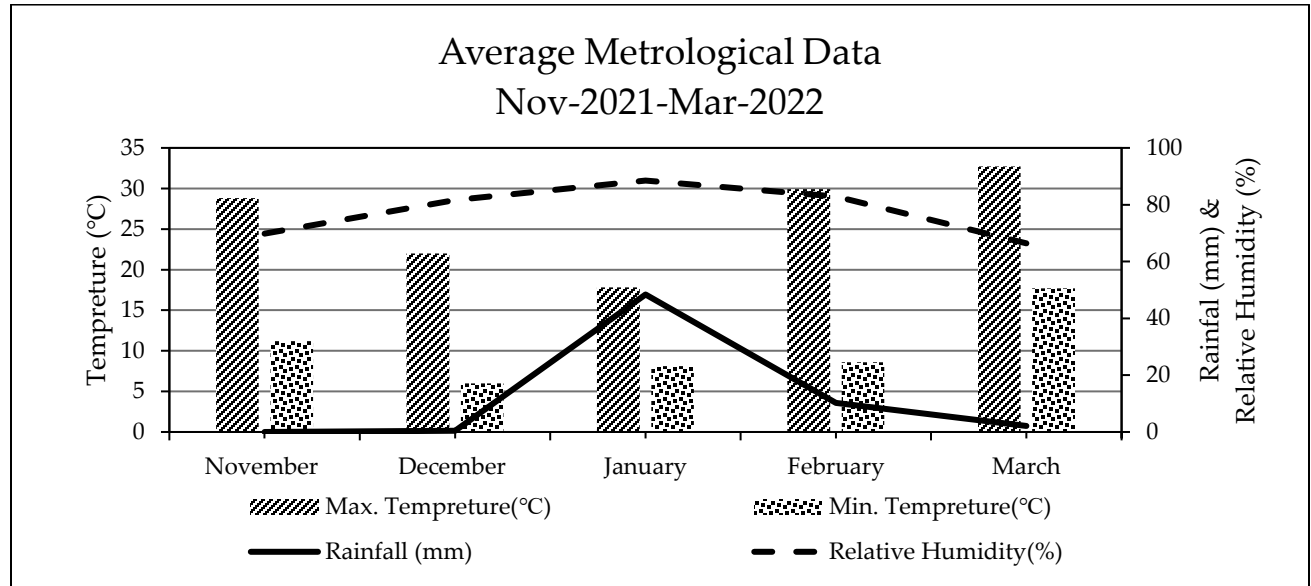

**Figure S1.** Average metrological data of the whole experimental period (November 2021–March 2022).
